# Supplementary material for: Mapping the clinical outcomes and genetic evolution of Ebola virus in Sierra Leone
Source: JCI journal article supplement (doi:10.1172/jci.insight.88333), 2017-08-02
Supplement: sd1 [file 1]

## Supplementary Materials for

# **Mapping the clinical outcomes and genetic evolution of Ebola viruses in Sierra Leone**

Tao Li<sup>1</sup>, Hong-Wu Yao<sup>1</sup>, Di Liu<sup>2</sup>, Hong-Guang Ren<sup>1,3</sup>, Yi Hu<sup>1</sup>, David Kargbo<sup>4</sup>, Yue Teng<sup>1</sup>,  
Yong-Qiang Deng<sup>1</sup>, Hui-Jun Lu<sup>5</sup>, Xiong Liu<sup>1</sup>, Kun Liu<sup>1</sup>, Li-Qun Fang<sup>1</sup>, Nian-Zhi Ning<sup>1</sup>, Gary  
Wong<sup>2</sup>, Foday Dafaë<sup>4</sup>, Abdul Kamara<sup>4</sup>, AiPing Wu<sup>6</sup>, Tai-Jiao Jiang<sup>6</sup>, Zhan Li<sup>1</sup>, Jie Huang<sup>1</sup>, Yu  
Sun<sup>1</sup>, Jun Qian<sup>5</sup>, Brima Kargbo<sup>4</sup>, Jia-Fu Jiang<sup>1</sup>, Hui Wang<sup>1</sup>, Wu-Chun Cao<sup>1</sup>

This file includes:

Figures S1 to S3

Tables S2

Other Supplementary Material for this manuscript includes the following:

Tables S1. The detail information of each sequence analyzed in this study.

**Figure S1. Relationship between laboratory-confirmed case number and EBOV number.** Daily (A) and chiefdom-level (B) number of cases from case database and EBOV from dataset of this study.

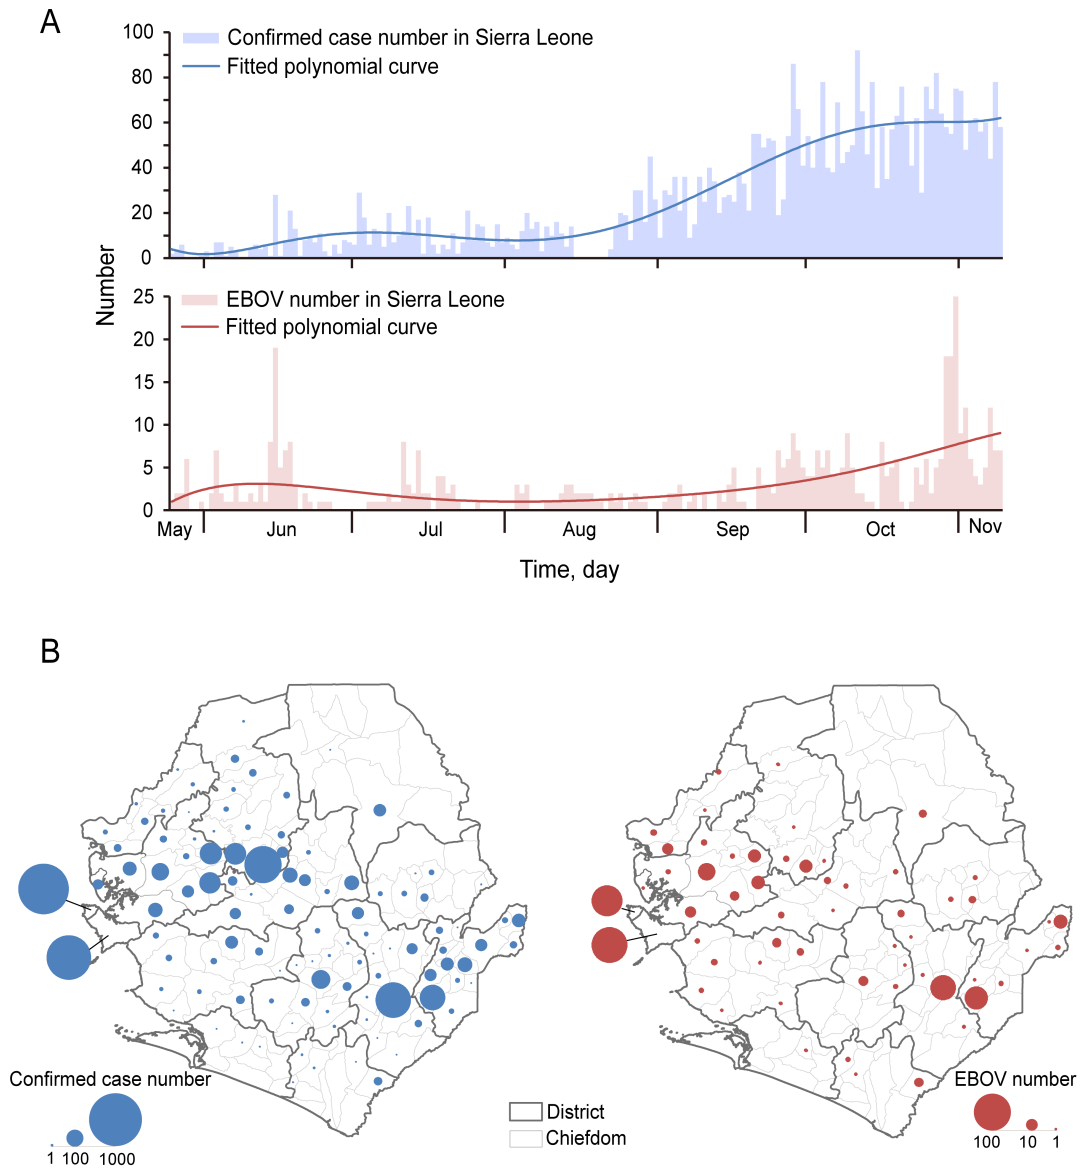

**Figure S2. Distribution (A) and proportion (B) of EBOV over months and lineages. SL3.1\* or SL3.2\* indicate other EBOV in SL3.1 or SL3.2.**

**A**

**EBOV distribution over months and lineages**

| Lineage | May | Jun | Jul | Aug | Sep | Oct | Nov-Dec |
|---------|-----|-----|-----|-----|-----|-----|---------|
| SL1     | 5   | 4   |     |     |     |     |         |
| SL2     | 6   | 25  | 2   |     | 2   |     |         |
| SL3.1.1 |     |     | 1   |     |     | 12  | 3       |
| SL3.1.2 |     |     |     | 1   | 13  | 18  | 21      |
| SL3.1.3 |     | 1   | 11  | 15  | 2   |     |         |
| SL3.1.4 |     |     | 1   |     | 9   | 1   |         |
| SL3.1*  | 1   | 39  | 17  | 5   | 6   | 3   | 2       |
| SL3.2.1 |     |     |     | 1   | 6   | 9   | 8       |
| SL3.2.2 |     |     |     | 2   | 8   | 11  | 5       |
| SL3.2.3 |     |     |     | 4   | 11  | 20  | 5       |
| SL3.2.4 |     |     |     | 3   | 10  | 51  | 18      |
| SL3.2.5 |     |     |     | 2   | 8   | 48  | 21      |
| SL3.2*  |     | 12  | 15  | 6   | 3   |     | 1       |

**B**

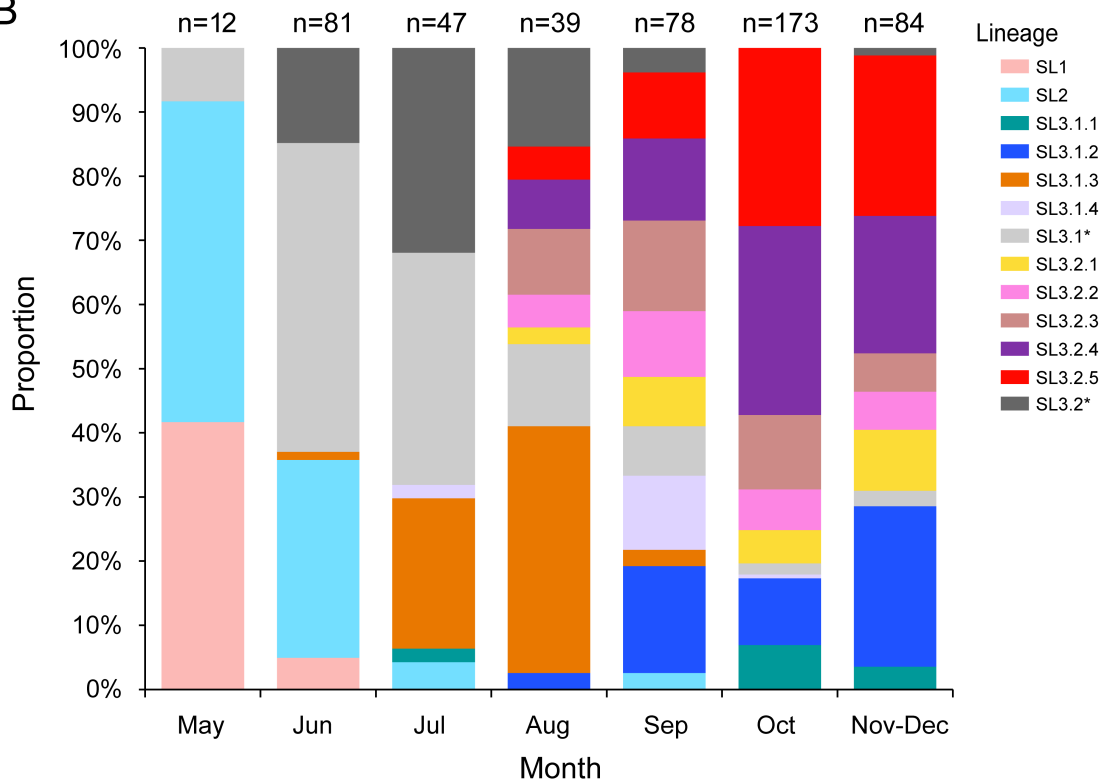

**Figure S3. Median-joining haplotype network the EBOV sequences. The provinces of each sequence were shown as different colors.**

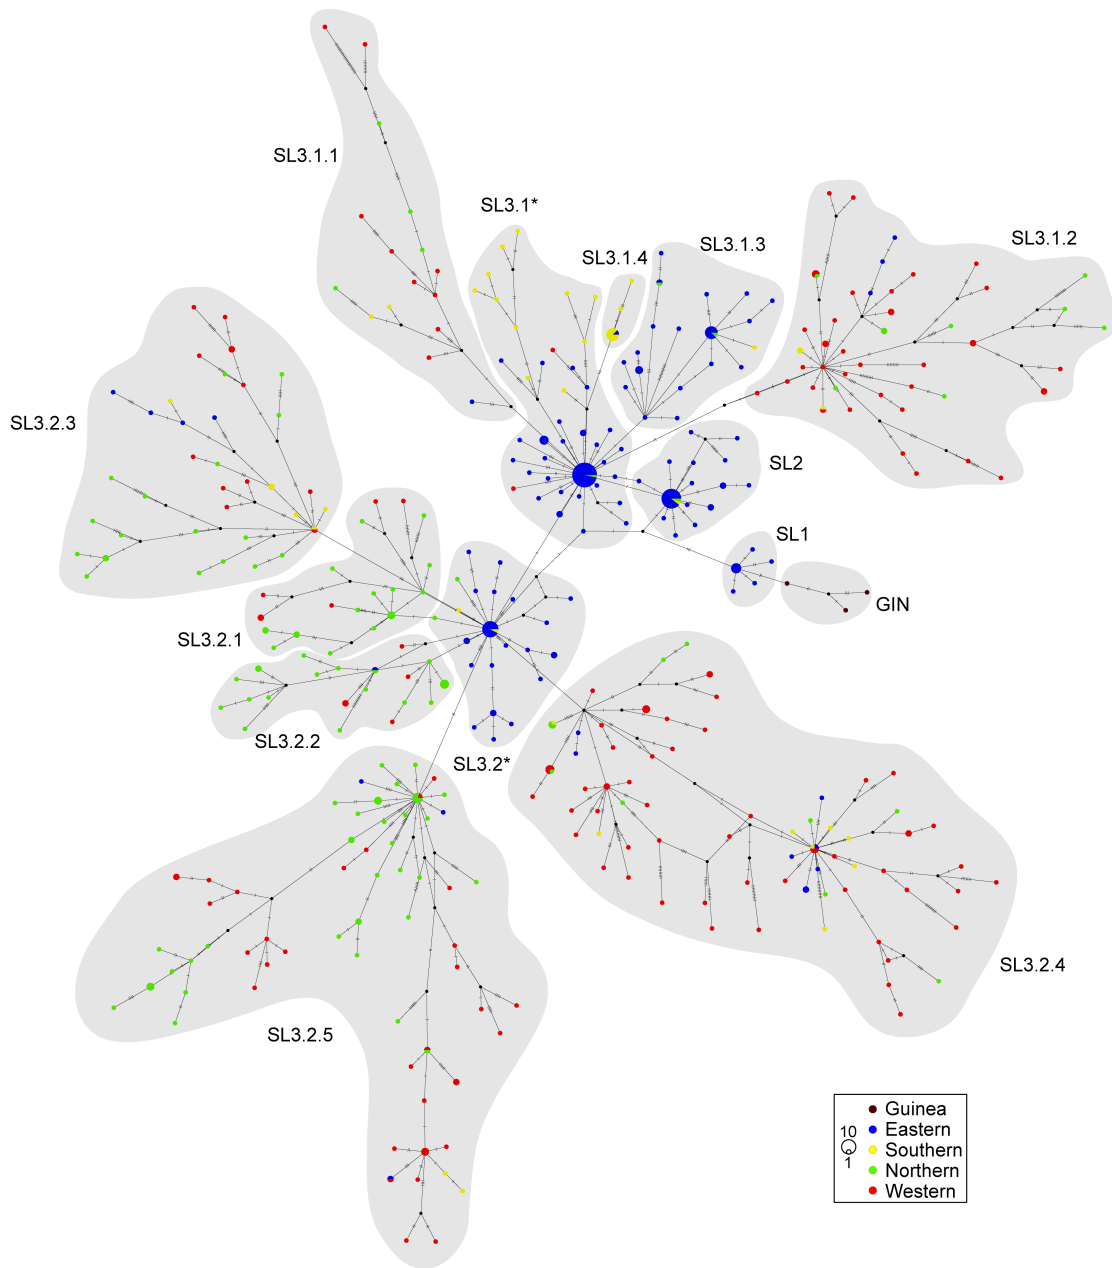

Table S2. Detailed information of substitutions labeled at Figure. 4.

| <b>Genome position</b> | <b>Reference</b> | <b>Mutation</b> | <b>Funtion area</b> | <b>Amino acid mutation</b> | <b>Mutation type</b> |
|------------------------|------------------|-----------------|---------------------|----------------------------|----------------------|
| 301                    | T                | C               | NP                  | -                          | Non-coding           |
| 800                    | C                | T               | NP_CDS              | Arg -> Cys                 | Non-synonymous       |
| 1849                   | T                | C               | NP_CDS              | Asp                        | Synonymous           |
| 3008                   | T                | C               | NP                  | -                          | Non-coding           |
| 3011                   | T                | C               | NP                  | -                          | Non-coding           |
| 3176                   | A                | G               | VP35_CDS            | Gln                        | Synonymous           |
| 3178                   | A                | G               | VP35_CDS            | Asn -> Ser                 | Non-synonymous       |
| 3484                   | A                | G               | VP35_CDS            | Lys -> Arg                 | Non-synonymous       |
| 3558                   | C                | T               | VP35_CDS            | Leu -> Phe                 | Non-synonymous       |
| 4130                   | A                | G               | VP35_CDS            | Lys                        | Synonymous           |
| 4171                   | G                | A               | VP35                | -                          | Non-coding           |
| 4200                   | A                | G               | VP35                | -                          | Non-coding           |
| 4208                   | A                | G               | VP35                | -                          | Non-coding           |
| 5276                   | T                | C               | VP40_CDS            | Thr                        | Synonymous           |
| 5849                   | T                | C               | VP40                | -                          | Non-coding           |
| 6283                   | C                | T               | GP_CDS              | Ala -> Val                 | Non-synonymous       |
| 6726                   | A                | G               | GP_CDS              | Thr -> Ala                 | Non-synonymous       |
| 7148                   | A                | G               | GP_CDS              | Ile -> Val                 | Non-synonymous       |
| 7867                   | C                | T               | GP_CDS              | Ile                        | Synonymous           |
| 7912                   | G                | A               | GP_CDS              | Gln                        | Synonymous           |
| 8742                   | A                | G               | VP30_CDS            | Gly                        | Synonymous           |
| 8835                   | T                | C               | VP30_CDS            | Cys                        | Synonymous           |
| 8921                   | A                | T               | VP30_CDS            | Glu -> Val                 | Non-synonymous       |
| 8928                   | A                | C               | VP30_CDS            | Pro                        | Synonymous           |
| 9925                   | T                | C               | VP24                | -                          | Non-coding           |
| 10196                  | T                | C               | VP24                | -                          | Non-coding           |
| 10218                  | G                | A               | VP24                | -                          | Non-coding           |

|       |   |   |          |            |                |
|-------|---|---|----------|------------|----------------|
| 10232 | A | G | VP24     | -          | Non-coding     |
| 10316 | A | T | VP24     | -          | Non-coding     |
| 10479 | T | A | VP24_CDS | Ile        | Synonymous     |
| 10752 | G | A | VP24_CDS | Met -> Ile | Non-synonymous |
| 11111 | A | G | VP24     | -          | Non-coding     |
| 11168 | G | A | VP24     | -          | Non-coding     |
| 11176 | A | T | VP24     | -          | Non-coding     |
| 11407 | C | T | VP24     | -          | Non-coding     |
| 11463 | G | A | VP24     | -          | Non-coding     |
| 12633 | C | T | L_CDS    | Phe        | Synonymous     |
| 12885 | A | C | L_CDS    | Leu        | Synonymous     |
| 14019 | T | C | L_CDS    | Pro        | Synonymous     |
| 15456 | G | A | L_CDS    | Leu        | Synonymous     |
| 15594 | T | C | L_CDS    | Asp        | Synonymous     |
| 15801 | C | T | L_CDS    | Asn        | Synonymous     |
| 15963 | G | A | L_CDS    | Lys        | Synonymous     |
| 16231 | T | C | L_CDS    | Leu        | Synonymous     |
| 16679 | A | G | L_CDS    | Lys -> Arg | Non-synonymous |
| 16895 | C | T | L_CDS    | Thr -> Ile | Non-synonymous |
| 16958 | A | G | L_CDS    | Gln -> Arg | Non-synonymous |
| 17100 | T | C | L_CDS    | Gly        | Synonymous     |
| 17142 | T | C | L_CDS    | Phe        | Synonymous     |
| 17445 | A | G | L_CDS    | Val        | Synonymous     |
| 17848 | G | A | L_CDS    | Ala -> Thr | Non-synonymous |
| 18081 | T | C | L_CDS    | Ile        | Synonymous     |
| 18143 | A | G | L_CDS    | Asp -> Gly | Non-synonymous |
| 18162 | C | T | L_CDS    | Ile        | Synonymous     |
| 18240 | G | T | L        | -          | Non-coding     |
| 18345 | A | G | UTR      | -          | Non-coding     |
| 18354 | C | T | UTR      | -          | Non-coding     |

|       |   |   |     |   |            |
|-------|---|---|-----|---|------------|
| 18556 | A | G | UTR | - | Non-coding |
| 18706 | T | C | UTR | - | Non-coding |
| 18728 | A | G | UTR | - | Non-coding |

---
